# Supplementary material for: Sigma-1 Receptor as a Protective Factor for Diabetes-Associated Cognitive Dysfunction via Regulating Astrocytic Endoplasmic Reticulum-Mitochondrion Contact and Endoplasmic Reticulum Stress
Source: MDPI journal article supplement (doi:10.3390/cells12010197), 2023-01-03
Supplement: s1 [file s1]

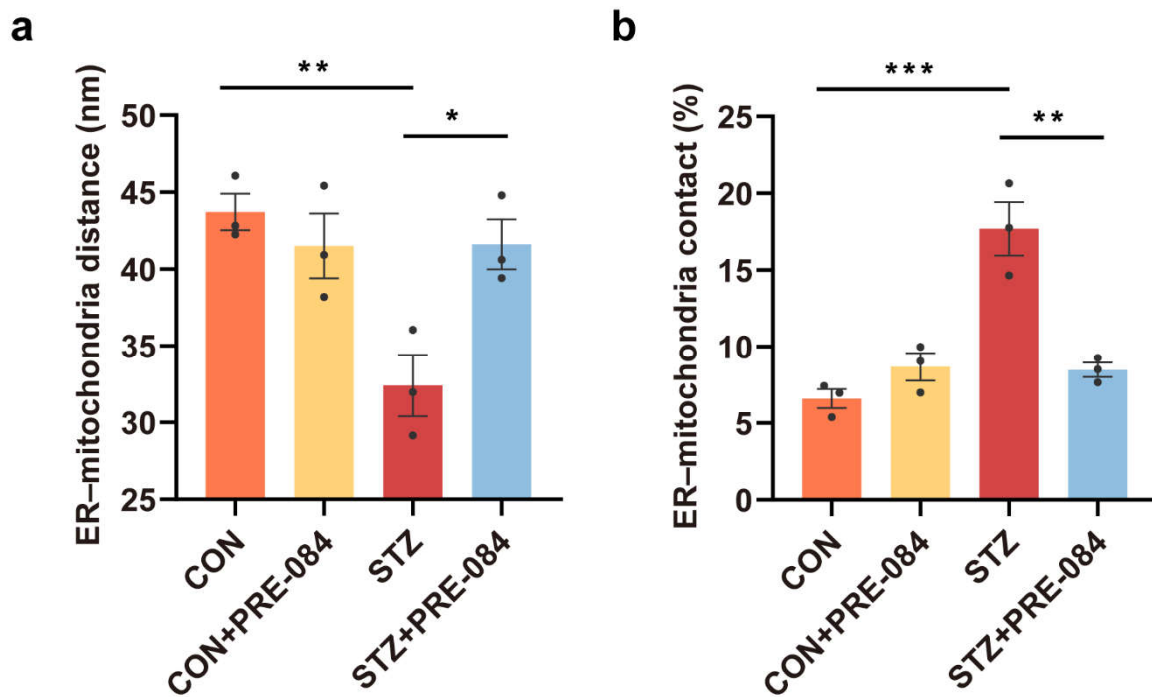

**Figure S1.** The role of Sig-1R agonist on ER-mitochondrion contact in the astrocytes of mice with T1DM.

(a) Quantitative analysis of the distance for ER-mitochondria contacts in astrocytes of CON, CON + PRE-084, STZ, and STZ + PRE-084 mice ( $n = 3$ ). (b) Quantitative analysis of astrocytic ER-mitochondria contact percentage ( $n = 3$ ). Each point represents the average value of a mouse for corresponding index. The data were presented as mean  $\pm$  SEM and analyzed using one-way ANOVA with Tukey's multiple comparisons test. \*  $p < 0.05$ ; \*\*  $p < 0.01$ ; \*\*\*  $p < 0.001$ . Sig-1R, sigma-1 receptor; ER, endoplasmic reticulum; T1DM, type 1 diabetes mellitus; CON, control mice; STZ, mice with T1DM.

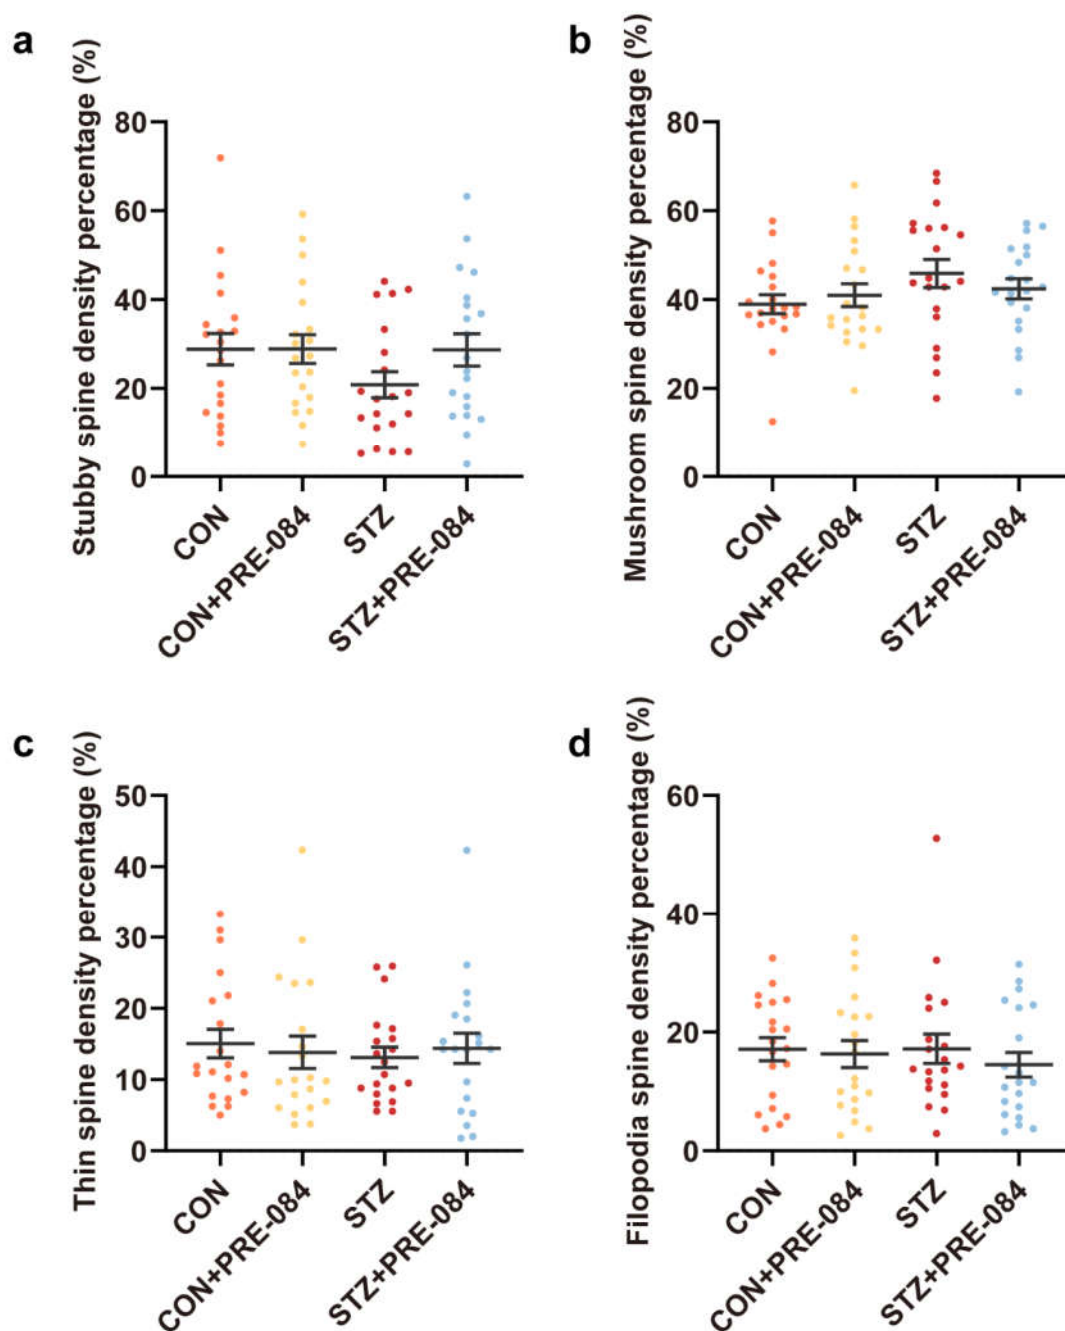

**Figure S2.** The effect of Sig-1R agonist on different spine density percentage.

(a) Quantitative analysis of stubby spine density percentage in CON, CON + PRE-084, STZ, and STZ + PRE-084 mice ( $n = 20$ ). (b) Quantitative analysis of mushroom spine density percentage in each group ( $n = 20$ ). (c) Quantitative analysis of thin spine density percentage in each group ( $n = 20$ ). (d) Quantitative analysis of filopodia spine density percentage in each group ( $n = 20$ ). The data were presented as mean  $\pm$  SEM and analyzed via one-way ANOVA with Tukey's multiple comparison tests, and Kruskal-Wallis test followed by Dunn's multiple comparison tests. Sig-1R, sigma-1 receptor; CON, control mice; STZ, mice with type 1 diabetes mellitus.

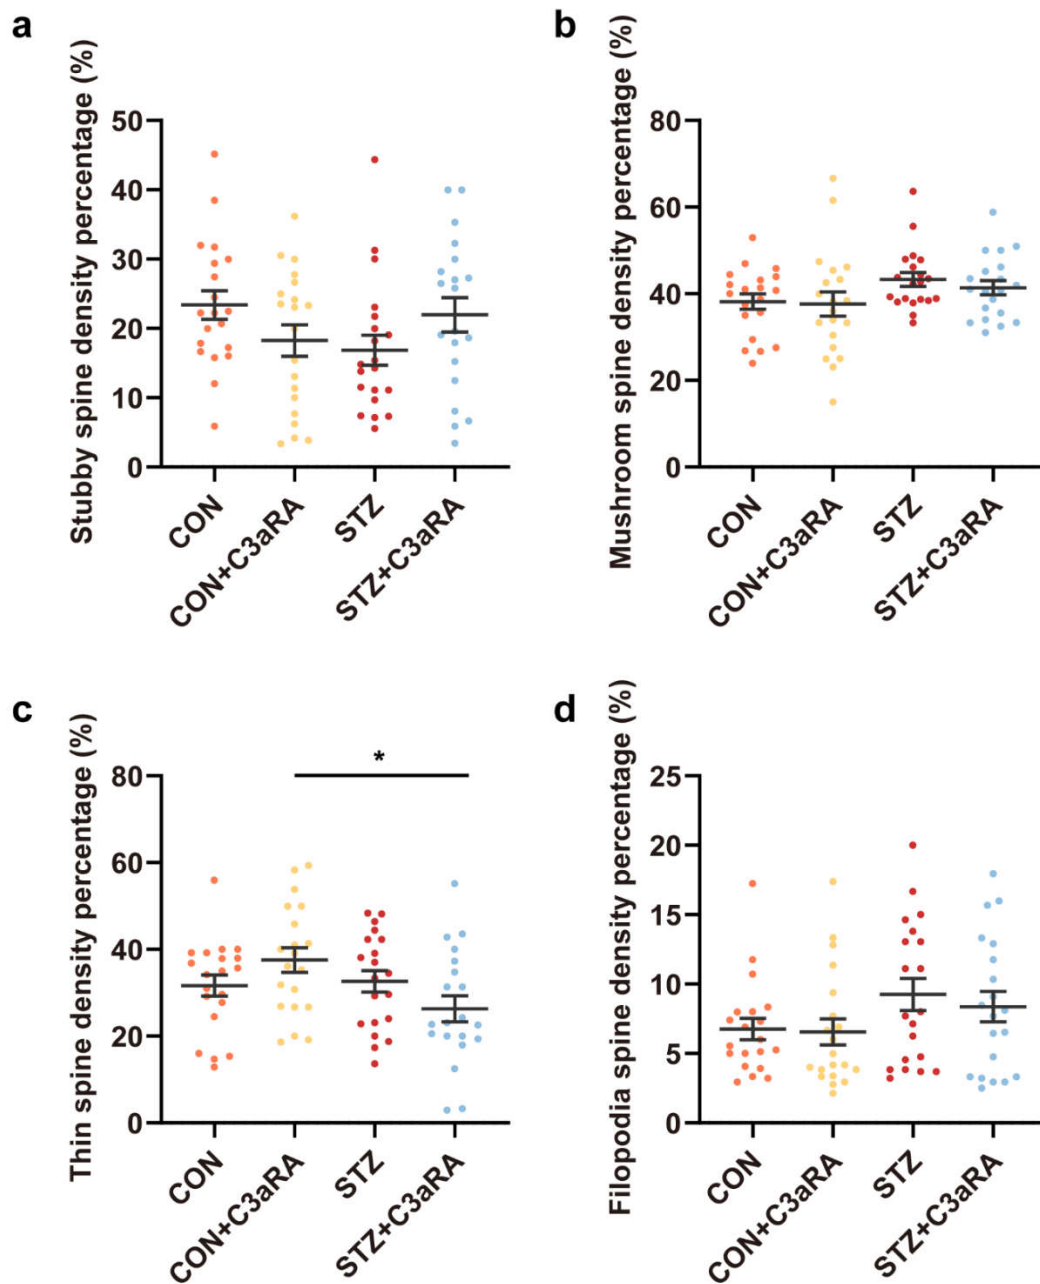

**Figure S3.** The role of C3aRA on different types of the spine density percentage.

(a) Quantitative analysis of stubby spine density percentage in CON, CON + C3aRA, STZ, and STZ + C3aRA mice ( $n = 20$ ). (b) Quantitative analysis of mushroom spine density percentage in each group ( $n = 20$ ). (c) Quantitative analysis of thin spine density percentage in each group ( $n = 20$ ). (d) Quantitative analysis of filopodia spine density percentage in each group ( $n = 20$ ). The data were presented as mean  $\pm$  SEM and analyzed via one-way ANOVA with Tukey's multiple comparison tests, and Kruskal-Wallis test followed by Dunn's multiple comparison tests. \*  $p < 0.05$ . C3aRA, complement component 3a receptor antagonist; CON, control mice; STZ, mice with type 1 diabetes mellitus.
